# Supplementary material for: Liver PPARα is crucial for whole-body fatty acid homeostasis and is protective against NAFLD
Source: HighWire-hosted journal article supplement (doi:10.1136/gutjnl-2015-310798), 2016-02-01
Supplement: gutjnl-2015-310798supp.pdf [file gutjnl-2015-310798supp.pdf]

# Supplementary File 1

## Supplementary Methods & References

### Generation of *floxed-Ppar $\alpha$* mice

The *floxed-Ppar $\alpha$*  mouse strain was generated at the Mouse Clinical Institute (Illkirch, France). High-fidelity PCR amplification of genomic DNA was used to generate a 4.5-kb 5' long arm, a 0.7-kb targeting arm including exon 4 (FA: floxed fragment), and a 3.2-kb 3' long arm including exon 5, which were assembled in a vector containing a neomycin resistance cassette and loxP and Flippase Recognition Target (FRP) sites. This targeting vector was electroporated into P1 ES cells (MCI-129Sv/Pas background). Homologous recombination was verified by PCR and Southern blot analysis using a Neoprobe, a 5' external probe (5'-AATGTTAGACAGGAATGGCAATGCC-3'; 5'-CTCTGTGTACAGCTGTCTTTTGAAC-3'), a 3' external probe (5'-CTACTGCCCTTGGTACCTTGAAATG-3'; 5'-CCTACCGTCTTTGTTACCTTCTTGC-3'), and three genomic DNA digestions (one with NsiI for the 5' insertion and two with HindIII or NdeI for the 3' insertion). To remove the neocassette, one positive ES cell clone was electroporated with a Flipase-expressing plasmid. The resultant recombination was screened by PCR.

The derived ES cell clones were injected into C57BL/6J blastocysts to produce chimeric mice expressing the *floxed-Ppar $\alpha$*  locus. Mice carrying the floxed allele were genotyped by PCR using HotStar Taq DNA Polymerase (5 U/ $\mu$ L, Qiagen) and forward (Ef; 5'-CTGTACTTTGTAGACATCTGAGAGGCG-3') and reverse primers (Er; 5'-TAGGTACCGTGGACTCAGAGCTAG-3' (figure 1 A). The amplification conditions were as follows: 15 min at 95°C; then 25 cycles of 94°C for 1 min, 65°C for 1 min, and 72°C for 1 min; and 72°C for 10 min. The wild-type and floxed alleles amplified 279-bp and 380-bp fragments, respectively. The obtained conditional knockout mouse strain was backcrossed with C57BL/6J.

### Generation of *Ppar $\alpha$* hepatocyte-specific knockout (*Ppar $\alpha$ <sup>hep-/-</sup>*) animals

*Ppar $\alpha$ <sup>hep-/-</sup>* animals were created at INRA's rodent facility (Toulouse, France) by mating the *floxed-Ppar $\alpha$*  mouse strain with C57BL/6J *albumin-Cre* transgenic mice (gifted from Prof. Didier Trono, EPFL, Lausanne, Switzerland) to obtain *albumin-Cre<sup>+/-</sup>Ppar $\alpha$ <sup>flox/flox</sup>* mice, i.e.

*Ppar* $\alpha^{hep-/-}$  mice. *Ppar* $\alpha$  deletion was confirmed by PCR using HotStar Taq DNA Polymerase (5 U/ $\mu$ L, Qiagen) and a forward (Lf; 5'-AAAGCAGCCAGCTCTGTGTTGAGC-3' and reverse primer (Er; 5'-TAGGTACCGTGGACTCAGAGCTAG-3') (figure 1A). Amplification conditions were as follows: 95°C for 15 min; followed by 35 cycles of 94°C for 1 min, 65°C for 1 min, and 72°C for 1 min; and 72°C for 10 min. This reaction produced 450-bp, 915-bp, and 1070-bp fragments with exon 4 deletion, the wild-type allele, and the floxed allele, respectively. The albumin-Cre allele was detected by PCR using the following primers pairs: CreU (5'-AGGTGTAGAGAAGGCACTTAG-3' and CreD (5'-CTAATCGCCATCTTCCAGCAGG-3'), and G2lox7F (5'-CCAATCCCTTGGTTCATGGTTGC-3') and G2lox7R (5'-CGTAAGGCCCAAGGAAGTCCTGC-3'). *Albumin-Cre* $^{-/-}$  *floxed-Ppar* $\alpha$  (*Ppar* $\alpha^{hep+/+}$ ) littermates and wild-type C57BL/6J mice were used as controls.

PPAR $\alpha$ -deficient C57BL/6J mice (*Ppar* $\alpha^{-/-}$ ) were bred at INRA's transgenic rodent facility. Age-matched C57BL/6J mice (provided by Charles River) were acclimated to local animal facility conditions prior to experiments. Mouse housing was temperature-controlled (at 22-24°C), with a 12-hour light/12-hour dark cycle. All studied mice were male and were fed a standard rodent diet (Safe 04 U8220G10R). Mice were killed at Zeitgeber time (ZT) 14 unless stated otherwise, with ZT0 being when the lights are turned on and ZT12 when lights are turned off.

### **DNA preparation for genotyping**

DNA was extracted from tail tissue and stored at -20°C. Samples were mixed with 75  $\mu$ L 25 mM NaOH, and 0.2 mM NA<sub>2</sub>EDTA (pH 12), then incubated for 10 min at 95°C. Samples were next cooled on ice for 10 min, mixed, and neutralized with 75  $\mu$ L 40 mM Tris-HCL (pH 5.0). After centrifugation (6 min; 14 000 rpm), 2.5  $\mu$ L of supernatant was used for PCR with HotStar Taq Polymerase (5 U/ $\mu$ L, Qiagen) following the manufacturer's instructions.

### **In vivo experiments**

#### **Fenofibrate treatment**

Fourteen-week-old wild-type C57BL/6J (WT), floxed wild-type (*Ppar* $\alpha^{hep+/+}$ ), *Ppar* $\alpha^{hep-/-}$ , and *Ppar* $\alpha^{-/-}$  mice received the PPAR $\alpha$  agonist fenofibrate (Sigma) (100 mg/kg/day) or vehicle (aqueous 3% gum Arabic) by gavage for 10 days (n=6 animals/genotype/treatment).

#### **Fasting and Fasting–re-feeding experiment**

Eight-week-old WT, (*Ppara*<sup>hep+/+</sup>), *Ppara*<sup>hep-/-</sup>, and *Ppara*<sup>-/-</sup> mice were fed *ad libitum*, fasted for 24 hours from ZT14, or fasted for 24 hours from ZT14 and then re-fed for the next 24 hours with glucose in water (200 g/L; Sigma). All mice were killed at ZT14 (n=6 mice/genotype/experimental condition). Wild-type (C57BL6/J) and *Fgf21*<sup>-/-</sup> mice (12 month-old) were sacrificed either at the fasted state (a 24hour fast) or at the fed state at ZT14, (n=5 mice/genotype/experimental condition).

### **Circadian experiment**

Eleven-week-old C57BL/6J mice were fed *ad libitum* or fasted from ZT0–ZT24. At ZT0, ZT4, ZT8, ZT12, ZT14, ZT16, ZT20, and ZT24, six mice from each condition were killed by cervical dislocation.

### **CL316243 activation of $\beta$ 3-adrenergic receptor**

Four-month-old (WT) and *Ppara*<sup>hep-/-</sup> mice were fasted at ZT0; given CL316243 (3 mg/mL/kg; Sigma C5976) or vehicle (0.5% carboxymethyl cellulose in sterilized water; Fluka, 21900) at ZT6; and killed at ZT14.

### **Nutritional challenge with a methionine- and choline-deficient (MCD) diet**

Eighteen-week-old WT, *Ppara*<sup>hep-/-</sup>, and *Ppara*<sup>-/-</sup> mice were fed for two weeks with a MCD (A02082002B) or control diet (A02082003B) obtained from Research Diet. Mice were killed at ZT8 (n=6 animals/genotype/group).

### **Nutritional challenge with a High Fat Diet**

Eighteen-week-old WT, *Ppara*<sup>hep-/-</sup>, and *Ppara*<sup>-/-</sup> mice were fed for two weeks with a HFD (D12492) or control diet (D12450J) obtained from Research Diet. Mice were killed at ZT8 (n=6 animals/genotype/group).

### **Aging experiment**

WT, *Ppara*<sup>hep-/-</sup> and *Ppara*<sup>-/-</sup> mice (n=12 each) were weighed weekly for 51 weeks. Mice were then killed at ZT14.

### **Adenoviral FGF21 expression**

FGF21 adenovirus or control (Genecust) was delivered to mice (WT, *Ppara*<sup>hep-/-</sup>, and *Ppara*<sup>-/-</sup>) through retro-orbital injection (5.10<sup>9</sup> [pfu]/mouse). Four days later, mice were fasted for 24h and sacrificed at ZT14.

### **Blood and tissue samples**

Prior to sacrifice, blood was collected from the submandibular vein with a lancet into EDTA-coated tubes (BD Microtainer, K2E tubes). Plasma was prepared by centrifugation (1500g, 10 min, 4°C) and stored at -80°C. Following euthanasia by cervical dislocation, organs were removed, weighed, dissected when necessary, and prepared for histological analysis, or snap-frozen in liquid nitrogen and stored at -80°C.

### **Liver neutral lipids analysis**

Tissue samples were homogenized in methanol/5 mM EGTA (2:1, v/v), and then lipids (corresponding to an equivalent of 2 mg tissue) were extracted following the Bligh–Dyer method using chloroform/methanol/water (2.5:2.5:2.1, v/v/v), in the presence of the internal standards glyceryl trinonadecanoate, stigmaterol, and cholesteryl heptadecanoate (Sigma). TGs, free cholesterol, and cholesterol esters were analysed by gas-liquid chromatography using a Focus Thermo Electron system with a Zebron-1 Phenomenex fused-silica capillary column (5 m, 0.32-mm i.d., 0.50-mm film thickness). Oven temperature was programmed to increase from 200 to 350°C at 5°C/min, and the carrier gas was hydrogen (0.5 bar). The injector and the detector temperatures were 315°C and 345°C, respectively.

### **Liver fatty acid analysis**

To measure total hepatic fatty acid methyl ester (FAME) molecular species, lipids corresponding to an equivalent of 1 mg of liver were extracted in the presence of glyceryl triheptadecanoate (0.5 µg) as an internal standard. The lipid extract was transmethylated with 1 ml of BF<sub>3</sub> in methanol (14% solution; Sigma-Aldrich) and 1 ml of hexane for 60 minutes at 100°C and evaporated to dryness, and the FAMES were extracted with hexane/water (2:1). The organic phase was evaporated to dryness and dissolved in 50 µl ethyl acetate. A sample (1 µl) of total FAME was analyzed by gas-liquid chromatography (Clarus 600 Perkin Elmer system, with Famewax RESTEK fused silica capillary columns, 30-m×0.32-mm i.d., 0.25-µm film thickness). Oven temperature was programmed from 110°C to 220°C at a rate of 2°C per minute, and the carrier gas was hydrogen (7.25 psi). The injector and the detector were at 225°C and 245°C, respectively.

### **Transcriptomic analysis**

A model was fitted using the limma lmFit function (1), and correction for multiple testing was applied using False Discovery Rate (Benjamini et al. 1995). Probes with an adjusted p value  $\leq 0.05$  were considered differentially expressed between conditions. Hierarchical clustering was applied to samples and differentially expressed probes using Pearson's correlation coefficient as distance and Ward's criterion for agglomeration. Gene Ontology (GO) Biological Process enrichment was evaluated using a conditional hypergeometric test (GOstats package,(3)). Functional annotation clustering of GO Biological Process were performed using DAVID Bioinformatics Resources 6.7 ((4,5)). Gene-gene interaction network were predicted using "Search Tool for the Retrieval of Interacting Genes" ((6) String V10).

### Supplementary references

- (1) Wettenhall JM, Smyth GK. limmaGUI: a graphical user interface for linear modeling of microarray data. *Bioinformatics*. 2004, 12;20(18):3705-6.
- (2) Benjamini Y, Hochberg Y. Controlling the False Discovery Rate: A practical and powerful Approach to multiple testing. *Journal of the royal Statistical Society. Series B (methodological)*, Vol.57, No.1 (1995), 289-300.
- (3) Falcon S, Gentleman R. Using GOstats to test gene lists for GO term association. *Bioinformatics*. 2007 Jan 15;23(2):257-8.
- (4) Huang DW, Sherman BT, Lempicki RA. Systematic and integrative analysis of large gene lists using DAVID Bioinformatics Resources. *Nature Protoc*. 2009;4(1):44-57.
- (5) Huang DW, Sherman BT, Lempicki RA. Bioinformatics enrichment tools: paths toward the comprehensive functional analysis of large gene lists. *Nucleic Acids Res*. 2009;37(1):1-13.
- (6) Szklarczyk D, Franceschini A, Wyder S, Forslund K, Heller D, Huerta-Cepas J, Simonovic M, Roth A, Santos A, Tsafou KP, Kuhn M, Bork P, Jensen LJ, von Mering C. STRING v10: protein-protein interaction networks, integrated over the tree of life. *Nucleic Acids Res*. 2015 Jan;43(Database issue):D447-52. doi: 10.1093/nar/gku1003.

## Supplementary File 2: Oligonucleotide sequences for real-time PCR

| Gene                                 | NCBI Refseq | Forward primer (5'-3')   | Reverse primer (5'-3')    |
|--------------------------------------|-------------|--------------------------|---------------------------|
| <i>Acadl</i>                         | NM_007381   | AGAAGTTCATCCCCAGATGAC    | GGCGTTCGTTCTTACTCCTTGT    |
| <i>Acox1</i>                         | NM_015729   | CAGACCCTGAAGAAATCATGTGG  | CAGGAACATGCCCAAGTGAAG     |
| <i>Cyp4a10</i>                       | NM_010011   | TCCAGCAGTTCCCATCACCT     | TTGCTTCCCCAGAACCATCT      |
| <i>Cyp4a14</i>                       | NM_007822   | TCAGTCTATTTCTGGTGCTGTTT  | GAGCTCCTTGTCCTTCAGATGGT   |
| <i>Fasn</i>                          | NM_007988   | AGTCAGCTATGAAGCAATTGTGGA | CACCCAGACGCCAGTGTTT       |
| <i>Fgf21</i>                         | NM_020013   | AAAGCCTCTAGGTTTCTTTGCCA  | CCTCAGGATCAAAGTGAGGCG     |
| <i>Fsp27</i>                         | NM_178373   | AGGCCCTGTCGTGTTAGCAC     | CATGATGCCTTTGCGAACCT      |
| <i>G6pd</i>                          | NM_019468   | GTGGGATCCTGAGGGAAGAGT    | GATGGTGGGATAGATCTTCTTCTTG |
| <i>Hmgcs2</i>                        | NM_008256   | TGCAGGAAACTTCGCTCACA     | AAATAGACCTCCAGGGCAAGGA    |
| <i>Plin5</i>                         | NM_025874   | CGCTCCATGAGTCAAGCCA      | CTCAGCTGCCAGGACTGCTA      |
| <i>Ppar<math>\alpha</math></i>       | NM_011144   | CCCTGTTTGTGGCTGCTATAATTT | GGGAAGAGGAAGGTGTCATCTG    |
| <i>Ppar<math>\beta/\delta</math></i> | NM_011145   | AAGTGGCCATGGGTGACG       | TGGTCCAGCAGGGAGGAAG       |
| <i>Ppar<math>\gamma</math></i>       | NM_011146   | CCACCAACTTCGGAATCAGCT    | TTTGTGGATCCGGCAGTTAAGA    |
| <i>Scd1</i>                          | NM_009127   | CAGTGCCGCGCATCTCTAT      | CAGCGGTACTCACTGGCAGA      |
| <i>Tbp</i>                           | NM_013684   | ACTTCGTGCAAGAAATGCTGAA   | GCAGTTGTCCGTGGCTCTCT      |
| <i>Tnf<math>\alpha</math></i>        | NM_013693   | TCCCCAAAGGGATGAGAAGTTC   | GCGCTGGCTCAGCCACT         |
| <i>Vnn1</i>                          | NM_011704   | ATGAGGTTTATGCCTTTGGAGC   | CCACAGGTGCGTAAATTGGTAG    |

### Supplementary File 3

**A - Functional annotation clustering GO (p-value < 0.01; DAVID Bioinformatics Resources 6.7) of the 99 Genes down-regulated in *Ppara*<sup>hep-/-</sup> mice compared to WT mice whatever the dietary status (fed, fasted, fasted-refed).**

| Functional categories               | GO references | Number of genes |
|-------------------------------------|---------------|-----------------|
| <i>Mitochondrion</i>                | GO:0005739    | 24              |
| <i>Oxidation reduction</i>          | GO:0055114    | 13              |
| <i>Mitochondrial part</i>           | GO:0044429    | 11              |
| <i>Fatty acid metabolic process</i> | GO:0006631    | 8               |
| <i>Endoplasmic reticulum</i>        | GO:0005783    | 8               |

**B - Predicted gene-gene interaction network (Search Tool for the Retrieval of Interacting Genes / String V10) amongst genes down-regulated in *Ppara*<sup>hep-/-</sup> mice compared to WT mice whatever the dietary status (fed, fasted, fasted-refed).**

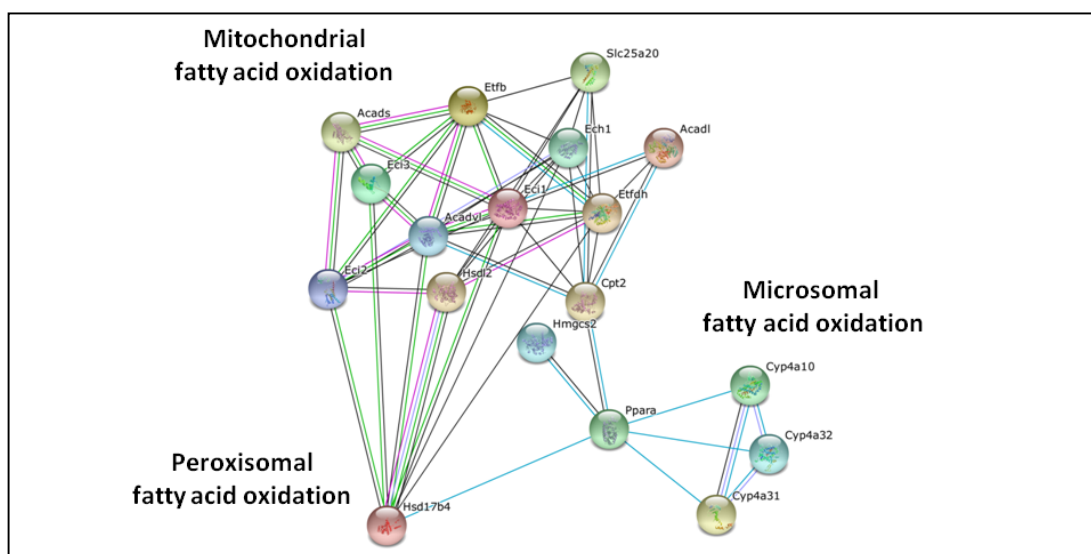

**C - Functional annotation clustering GO (p-value < 0.01; DAVID Bioinformatics Resources 6.7) of the 27 Genes up-regulated in *Ppara*<sup>hep-/-</sup> mice compared to WT mice whatever the dietary status (fed, fasted, fasted-refed)**

| Functional categories            | GO references | Number of genes |
|----------------------------------|---------------|-----------------|
| <i>Endopeptidase activity</i>    | GO:0004175    | 4               |
| <i>Cytoskeleton organization</i> | GO:0007010    | 3               |

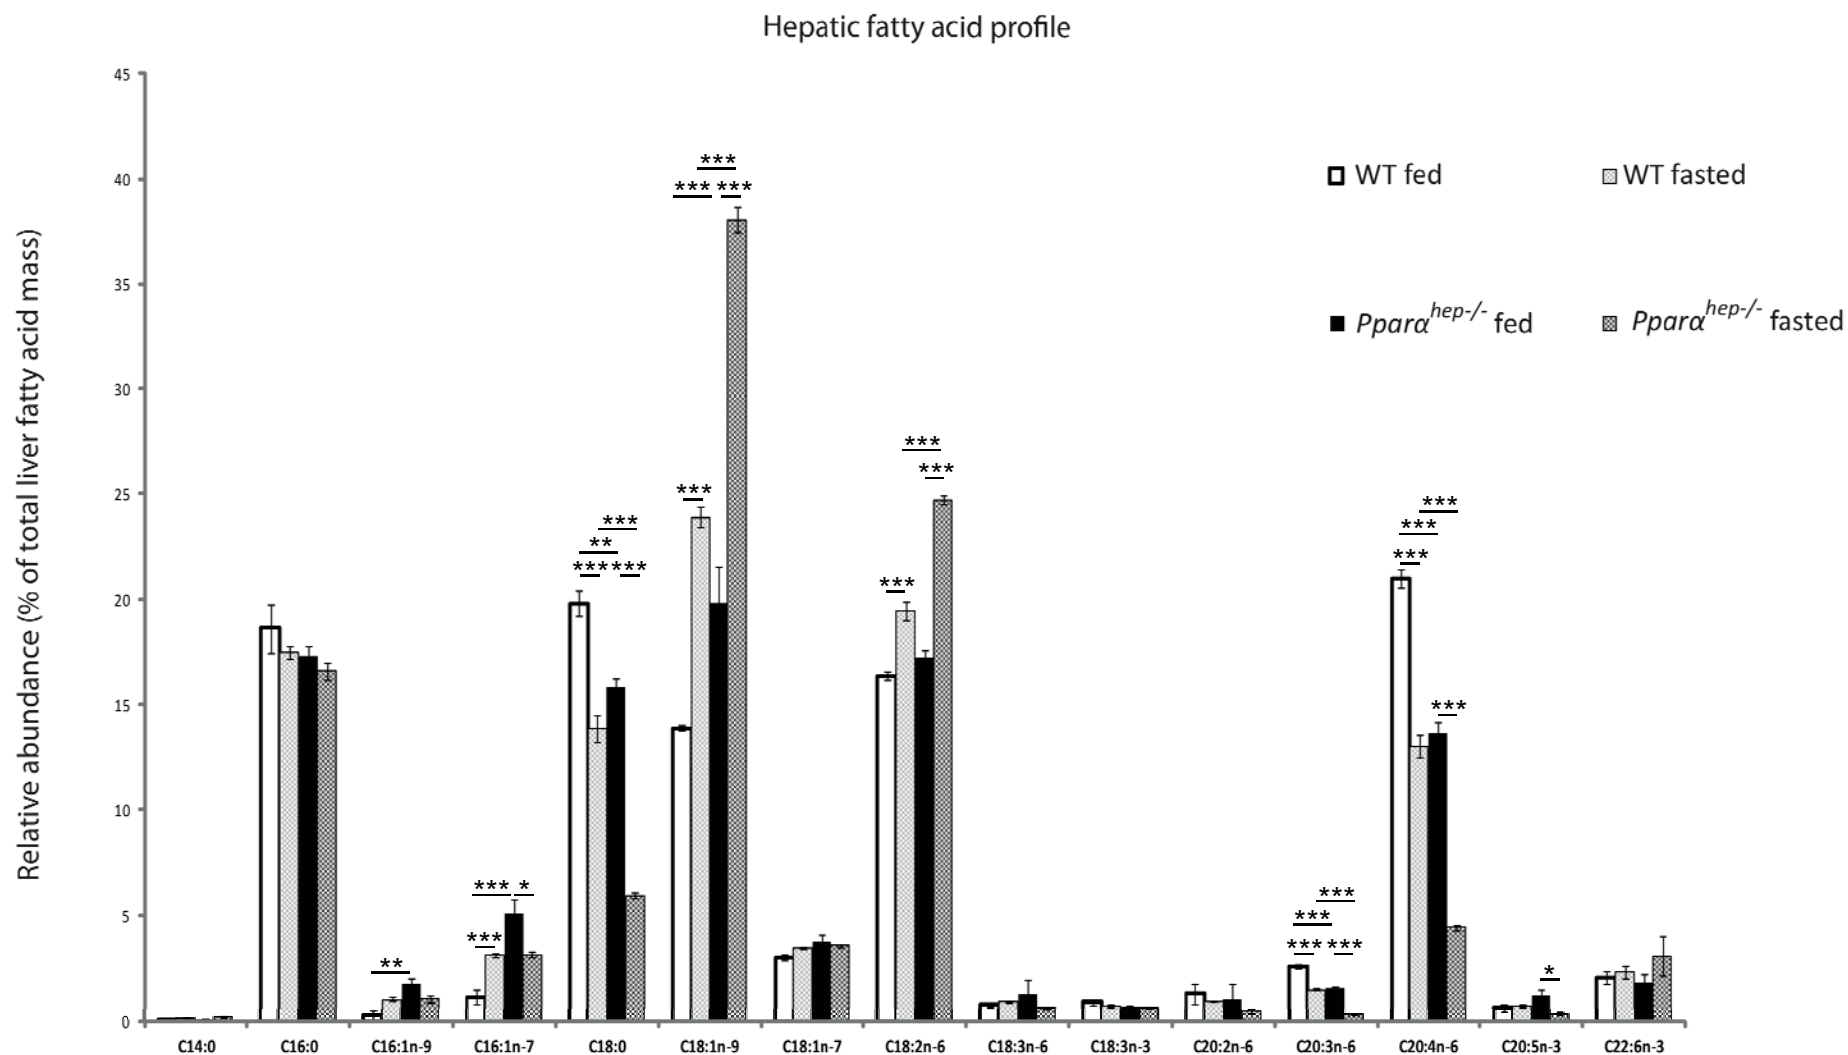

**Hepatic fatty acid profile is modified by fasting and sensitive to hepatocyte *Ppara* deficiency.** Relative abundance of hepatic fatty acids in WT and *Ppara*<sup>hep-/-</sup> mice fed or fasted for 24 hours was quantified by gas-liquid chromatography. Data are shown as mean  $\pm$  SEM (n = 8 per group). \* $p \leq 0.05$ , \*\* $p \leq 0.01$ , \*\*\* $p \leq 0.005$ .





**Supplementary File 6**

List of genes down-regulated by Fenofibrate (Log FC&gt;1) and fasting in WT but not in PPARalpha hep-/-

| GeneName | SystematicName | logFC_LKO_Feno.LWT_Feno |
|----------|----------------|-------------------------|
| Gm10804  | NR_040533      | 4.338990155             |
| Slco1a4  | NM_030687      | 3.946688844             |
| Gpr110   | NM_133776      | 3.724069586             |
| Blnk     | NM_008528      | 3.594694282             |
| Rgs16    | NM_011267      | 3.328073207             |
| Gck      | NM_010292      | 2.704553909             |
| Apoa4    | NM_007468      | 2.698950403             |
| Gm4477   | NM_001253910   | 2.632084145             |
| Ihh      | NM_010544      | 2.628286186             |
| Sdr9c7   | NM_027301      | 2.600846197             |
| Arhgef16 | NM_001112744   | 2.600390221             |
| Kcp      | NM_001029985   | 2.587688912             |
| Smpd3    | NM_021491      | 2.502656144             |
| Omd      | NM_012050      | 2.446293066             |
| Avpr1a   | NM_016847      | 2.321034098             |
| Clec2h   | NM_053165      | 2.319711826             |
| Cys1     | NM_138686      | 2.251262731             |
| Tuba8    | NM_017379      | 2.21333475              |
| Irf5     | NM_012057      | 2.205714139             |
| Il20     | AK078698       | 2.188175561             |
| Evc2     | NM_145920      | 2.148281671             |
| Il22ra1  | NM_178257      | 2.14017001              |
| Irx1     | NM_010573      | 2.135892072             |
| Plekhf1  | NM_024413      | 2.071611419             |
| Vasn     | NM_139307      | 2.064549145             |

|                |                    |             |
|----------------|--------------------|-------------|
| <b>Cebpe</b>   | NM_207131          | 2.057939233 |
| <b>Cyp2c54</b> | NM_206537          | 2.00580505  |
| <b>Fmn2</b>    | NM_019445          | 2.004180784 |
| <b>Ntf5</b>    | NM_198190          | 1.974077658 |
| <b>Espn</b>    | NM_207687          | 1.930187477 |
| <b>Usp18</b>   | NM_011909          | 1.929054274 |
| <b>Gldn</b>    | NM_177350          | 1.902430883 |
| <b>Snhg11</b>  | NM_175692          | 1.901885961 |
| <b>Gm10804</b> | NR_040532          | 1.880303132 |
| <b>Mx2</b>     | NM_013606          | 1.833471447 |
| <b>Espn</b>    | NM_207687          | 1.752424815 |
| <b>Pkdcc</b>   | NM_134117          | 1.74787401  |
| <b>Dnajb11</b> | NM_026400          | 1.693734168 |
| <b>Apol9a</b>  | NM_173786          | 1.682036041 |
| <b>Itpka</b>   | NM_146125          | 1.653329387 |
| <b>Evc</b>     | NM_021292          | 1.640295176 |
| <b>Cyp2c54</b> | NM_206537          | 1.634821607 |
| <b>Ifi2711</b> | NM_026790          | 1.614340511 |
| <b>Nat8</b>    | NM_023455          | 1.611264421 |
| <b>Kalrn</b>   | ENSMUST00000023522 | 1.606828632 |
| <b>Sult1c2</b> | NM_026935          | 1.597522687 |
| <b>Cyp2c50</b> | NM_134144          | 1.530074931 |
| <b>Aqp4</b>    | NM_009700          | 1.520689629 |
| <b>Osgin1</b>  | NM_027950          | 1.51068762  |
| <b>Apol9b</b>  | NM_001168660       | 1.50682592  |
| <b>Apol9a</b>  | NM_173786          | 1.491777402 |
| <b>Cyp2c38</b> | NM_010002          | 1.458490249 |
| <b>Plekhg5</b> | NM_001004156       | 1.423607071 |

|                 |              |             |
|-----------------|--------------|-------------|
| <b>Rsad2</b>    | NM_021384    | 1.421197068 |
| <b>Irf7</b>     | NM_016850    | 1.419635985 |
| <b>Pde4b</b>    | NM_019840    | 1.416581869 |
| <b>Slco1a1</b>  | NM_013797    | 1.395577407 |
| <b>Slc17a1</b>  | NM_009198    | 1.37865757  |
| <b>Rtp4</b>     | NM_023386    | 1.36680329  |
| <b>Hist3h2a</b> | NM_178218    | 1.361828009 |
| <b>Tnfrsf25</b> | NM_033042    | 1.357712549 |
| <b>Cyp1a2</b>   | NM_009993    | 1.337789611 |
| <b>Synj2</b>    | NM_001113353 | 1.336116722 |
| <b>Kalrn</b>    | NM_177357    | 1.324905667 |
| <b>Slco2a1</b>  | NM_033314    | 1.323539871 |
| <b>Ifit1</b>    | NM_008331    | 1.320506833 |
| <b>Ear11</b>    | NM_053113    | 1.312705755 |
| <b>Crym</b>     | NM_016669    | 1.289927484 |
| <b>Nupr1</b>    | NM_019738    | 1.268707101 |
| <b>Tiam2</b>    | NM_011878    | 1.25324319  |
| <b>Gga2</b>     | NM_028758    | 1.248227354 |
| <b>Igsf8</b>    | NM_080419    | 1.245743645 |
| <b>Tmem161a</b> | NM_145597    | 1.239198661 |
| <b>Pcp4l1</b>   | NM_025557    | 1.232257914 |
| <b>Hsd11b1</b>  | NM_008288    | 1.230227521 |
| <b>Samd1</b>    | NM_001081415 | 1.224727976 |
| <b>Dntt</b>     | NM_009345    | 1.21978365  |
| <b>Ppp4r4</b>   | NM_028980    | 1.213756156 |
| <b>Ugt2b1</b>   | NM_152811    | 1.209964061 |
| <b>Gstm2</b>    | NM_008183    | 1.205891998 |
| <b>C6</b>       | NM_016704    | 1.203122019 |

|                |              |             |
|----------------|--------------|-------------|
| <b>Gstm2</b>   | NM_008183    | 1.198638812 |
| <b>Pcbp4</b>   | NM_021567    | 1.189312741 |
| <b>Grm8</b>    | NM_008174    | 1.179630647 |
| <b>Gm2a</b>    | NM_010299    | 1.162405548 |
| <b>Pla1a</b>   | NM_134102    | 1.162394508 |
| <b>Ifit3</b>   | NM_010501    | 1.158512211 |
| <b>Gstm2</b>   | NM_008183    | 1.156968065 |
| <b>Oas1a</b>   | NM_145211    | 1.143199028 |
| <b>Oas1a</b>   | NM_145211    | 1.136708122 |
| <b>Lrp2</b>    | NM_001081088 | 1.123876743 |
| <b>Cdk20</b>   | NM_053180    | 1.115737794 |
| <b>Prodh</b>   | NM_011172    | 1.106241577 |
| <b>Mgat2</b>   | NM_146035    | 1.097829676 |
| <b>Cyp2c29</b> | NM_007815    | 1.095120899 |
| <b>Mast4</b>   | NM_175171    | 1.091260632 |
| <b>Pcsk9</b>   | NM_153565    | 1.089930194 |
| <b>Adora1</b>  | NM_001008533 | 1.076713157 |
| <b>Gvin1</b>   | NM_029000    | 1.073977553 |
| <b>Pigf</b>    | NM_008838    | 1.069604813 |
| <b>Efhd2</b>   | NM_025994    | 1.062608113 |
| <b>Rtkn</b>    | NM_133641    | 1.061122385 |
| <b>Prss8</b>   | NM_133351    | 1.060518018 |
| <b>Armcx3</b>  | NM_027870    | 1.055236819 |
| <b>Oas1f</b>   | NM_145153    | 1.054884833 |
| <b>Slc37a1</b> | NM_153062    | 1.05113534  |
| <b>Fam47e</b>  | NM_001033478 | 1.048260327 |
| <b>Wif1</b>    | NM_011915    | 1.047675224 |
| <b>Bhlhe40</b> | NM_011498    | 1.041719532 |

|                |              |             |
|----------------|--------------|-------------|
| <b>Homer2</b>  | NM_011983    | 1.041124787 |
| <b>Mx1</b>     | NM_010846    | 1.039795857 |
| <b>Cmpk2</b>   | NM_020557    | 1.036328603 |
| <b>Agap2</b>   | NM_001033263 | 1.024070237 |
| <b>Prss8</b>   | NM_133351    | 1.020288658 |
| <b>Rnd2</b>    | NM_009708    | 1.017853772 |
| <b>Sqle</b>    | NM_009270    | 1.017528952 |
| <b>Neurl1a</b> | NM_021360    | 1.009526359 |

**Supplementary File 7: Functional annotation clustering GO (p-value < 0.01; DAVID Bioinformatics Resources 6.7) of the 698 Genes repressed by fenofibrate and fasting in WT and *Pparα hep+/+* but not in *Pparα hep-/-* mice (nor in *Pparα-/-* mice)**

| <b>Functional categories</b>                            | <b>GO references</b> | <b>Number of genes</b> |
|---------------------------------------------------------|----------------------|------------------------|
| <i>Endoplasmic reticulum</i>                            | GO:0005783           | 61                     |
| <i>Endoplasmic reticulum part</i>                       | GO:0044432           | 24                     |
| <i>Microsome</i>                                        | GO:0005792           | 13                     |
| <i>Endosome</i>                                         | GO:0005768           | 21                     |
| <i>Lysosome</i>                                         | GO:0005764           | 14                     |
| <i>Regulation of Ras protein signal transduction</i>    | GO:0046578           | 13                     |
| <i>Organic anion transmembrane transporter activity</i> | GO:0008514           | 4                      |

**Supplementary File 8**

List of genes up-regulated by Fenofibrate (Log FC&gt;2) and fasting in WT but not in PPARalpha hep-/-

| <b>GeneName</b> | <b>SystematicName</b> | <b>logFC_LKO_Feno.LWT_Feno</b> |
|-----------------|-----------------------|--------------------------------|
| Vnn1            | NM_011704             | -6.327507248                   |
| Cyp4a32         | NM_001100181          | -6.196767964                   |
| Cyp4a14         | NM_007822             | -5.960408744                   |
| Cyp4a31         | NM_001252539          | -5.634232845                   |
| Cyp4a10         | NM_010011             | -5.439267814                   |
| Krt23           | NM_033373             | -5.390005991                   |
| Cyp4a10         | NM_010011             | -5.344449564                   |
| Cyp4a10         | NM_010011             | -5.311799175                   |
| Rad51l1         | NM_009014             | -5.168389733                   |
| Gm15441         | NR_040409             | -5.022337513                   |
| Cyp4a31         | NM_201640             | -4.994452308                   |
| Agpat9          | NM_172715             | -4.981241516                   |
| Acot2           | NM_134188             | -4.774193064                   |
| Cyp4a31         | NM_001252539          | -4.739402899                   |
| Serinc2         | NM_001253386          | -4.694405198                   |
| Mfsd2a          | NM_029662             | -4.559186147                   |
| Rab30           | NM_029494             | -4.460954496                   |
| Serinc2         | NM_172702             | -4.442471841                   |
| Acot3           | NM_134246             | -4.39217577                    |
| Ehhadh          | NM_023737             | -3.943620325                   |
| Serinc2         | NM_001253386          | -3.720914131                   |
| Cidec           | NM_178373             | -3.699841322                   |
| Acot3           | NM_134246             | -3.695985114                   |
| Slc25a34        | NM_001013780          | -3.540701791                   |



|                 |              |              |
|-----------------|--------------|--------------|
| <b>Tmem43</b>   | NM_028766    | -3.519129781 |
| <b>Clstn3</b>   | NM_153508    | -3.501309851 |
| <b>Dlg4</b>     | NM_007864    | -3.459813265 |
| <b>Raet1e</b>   | NM_198193    | -3.417569383 |
| <b>Acot5</b>    | NM_145444    | -3.407106296 |
| <b>Rtn4</b>     | NM_194054    | -3.319773259 |
| <b>Mtnr1a</b>   | NM_008639    | -3.316641914 |
| <b>Gal3st1</b>  | NM_016922    | -3.241994667 |
| <b>Mogat1</b>   | NM_026713    | -3.208183376 |
| <b>Enc1</b>     | NM_007930    | -3.202252717 |
| <b>Rufy4</b>    | NM_001034060 | -3.201516745 |
| <b>Lgals4</b>   | NM_010706    | -3.144456887 |
| <b>Spc25</b>    | NM_001199123 | -3.115026503 |
| <b>Hsd17b11</b> | NM_053262    | -3.109470457 |
| <b>Lgals4</b>   | NM_010706    | -3.092738086 |
| <b>Gm4952</b>   | NM_001013762 | -3.043309935 |
| <b>Lgals4</b>   | NM_010706    | -3.025184183 |
| <b>Fitm1</b>    | NM_026808    | -3.02238903  |
| <b>Retsat</b>   | NM_026159    | -2.986135359 |
| <b>Cda</b>      | NM_028176    | -2.979215647 |
| <b>Qpct</b>     | NM_027455    | -2.973192363 |
| <b>Gna15</b>    | NM_010304    | -2.943823781 |
| <b>Cbfa2t3</b>  | NM_009824    | -2.938950583 |
| <b>Fbf1</b>     | NM_172571    | -2.901652108 |
| <b>Decr2</b>    | NM_011933    | -2.836606019 |
| <b>Slc22a5</b>  | NM_011396    | -2.815808723 |
| <b>Slc25a20</b> | NM_020520    | -2.793833675 |
| <b>G0s2</b>     | NM_008059    | -2.791025291 |

|                |                    |              |
|----------------|--------------------|--------------|
| <b>Acaa1b</b>  | NM_146230          | -2.786928971 |
| <b>Rab30</b>   | NM_029494          | -2.77538891  |
| <b>Rarres1</b> | NM_001164763       | -2.7711581   |
| <b>Paqr7</b>   | NM_027995          | -2.739895455 |
| <b>E2f8</b>    | NM_001013368       | -2.739403931 |
| <b>Lgals6</b>  | NM_010707          | -2.708925191 |
| <b>Tmtc2</b>   | NM_177368          | -2.630701853 |
| <b>Slc35f2</b> | NM_028060          | -2.624275495 |
| <b>Ddh2</b>    | NM_028102          | -2.600504871 |
| <b>Cpt1b</b>   | NM_009948          | -2.57618651  |
| <b>Nceh1</b>   | NM_178772          | -2.551744536 |
| <b>Aldh3a2</b> | NM_007437          | -2.5462088   |
| <b>Abhd6</b>   | NM_025341          | -2.541903604 |
| <b>Fitm2</b>   | ENSMUST00000109418 | -2.541338387 |
| <b>Tmem98</b>  | NM_029537          | -2.527726347 |
| <b>Plin5</b>   | NM_001077348       | -2.522330477 |
| <b>Ech1</b>    | NM_016772          | -2.510705785 |
| <b>Abhd6</b>   | NM_025341          | -2.502624595 |
| <b>Paqr9</b>   | NM_198414          | -2.492189808 |
| <b>Cox6b2</b>  | NM_183405          | -2.488991428 |
| <b>Sema5b</b>  | NM_013661          | -2.486591564 |
| <b>Chrna2</b>  | NM_144803          | -2.443155692 |
| <b>Eci3</b>    | NM_026947          | -2.432854016 |
| <b>Dnase1</b>  | NM_010061          | -2.393569551 |
| <b>Sema5b</b>  | NM_013661          | -2.389349368 |
| <b>Hr</b>      | NM_021877          | -2.362630738 |
| <b>Etfdh</b>   | NM_025794          | -2.361997894 |
| <b>Caln1</b>   | NM_021371          | -2.338121081 |

|                 |                    |              |
|-----------------|--------------------|--------------|
| <b>Cerkl</b>    | NM_001048176       | -2.325203282 |
| <b>Acsl1</b>    | NM_007981          | -2.322008159 |
| <b>Tmed5</b>    | NM_028876          | -2.320397015 |
| <b>Pex11a</b>   | NM_011068          | -2.317353629 |
| <b>Acot8</b>    | NM_133240          | -2.313631361 |
| <b>Eci2</b>     | NM_011868          | -2.303602498 |
| <b>Slc6a16</b>  | XM_355900          | -2.290913244 |
| <b>Slc22a21</b> | NM_019723          | -2.280482356 |
| <b>Unc5b</b>    | NM_029770          | -2.270525456 |
| <b>Fitm2</b>    | NM_173397          | -2.256975833 |
| <b>Cpt2</b>     | NM_009949          | -2.250380721 |
| <b>Paqr9</b>    | NM_198414          | -2.242478857 |
| <b>Cpt2</b>     | NM_009949          | -2.23990941  |
| <b>Olfr15</b>   | NM_008762          | -2.238433986 |
| <b>Raet1c</b>   | NM_009018          | -2.222906132 |
| <b>Acot8</b>    | NM_133240          | -2.218917378 |
| <b>Hsd12</b>    | NM_024255          | -2.216041134 |
| <b>Celf2</b>    | NM_010160          | -2.210853201 |
| <b>Ctif</b>     | NM_201354          | -2.180316331 |
| <b>Lamb3</b>    | NM_008484          | -2.179424444 |
| <b>Mmd</b>      | ENSMUST00000004050 | -2.168017347 |
| <b>Decr1</b>    | NM_026172          | -2.167975542 |
| <b>Mmd</b>      | NM_026178          | -2.16265343  |
| <b>Raet1b</b>   | NM_009017          | -2.133017556 |
| <b>Celf2</b>    | NM_010160          | -2.123555678 |
| <b>Crat</b>     | NM_007760          | -2.116353216 |
| <b>Adam32</b>   | NM_153397          | -2.08602317  |
| <b>Txnip</b>    | NM_001009935       | -2.07753964  |

|                 |                    |              |
|-----------------|--------------------|--------------|
| <b>Pxmp4</b>    | NM_021534          | -2.064830579 |
| <b>Slc16a11</b> | NM_153081          | -2.058554385 |
| <b>Slc16a13</b> | NM_172371          | -2.055575511 |
| <b>Mmd</b>      | ENSMUST00000134929 | -2.022985304 |
| <b>Gm7969</b>   | XM_982175          | -2.002981056 |

**Supplementary File 9: Functional annotation clustering GO (p-value < 0.01; DAVID Bioinformatics Resources 6.7) of the 907 Genes induced by fenofibrate and fasting in WT and *Ppar $\alpha$  hep+/+* but not in *Ppar $\alpha$  hep-/-* mice (nor in *Ppar $\alpha$ -/-* mice)**

| Functional categories                                               | GO references | Number of genes |
|---------------------------------------------------------------------|---------------|-----------------|
| <i>Mitochondrion</i>                                                | GO:0005739    | 219             |
| <i>Generation of precursor metabolites and energy</i>               | GO:0006091    | 50              |
| <i>Fatty acid metabolic process</i>                                 | GO:0006631    | 39              |
| <i>Peroxisome</i>                                                   | GO:0005777    | 37              |
| <i>Mitochondrial matrix</i>                                         | GO:0005759    | 37              |
| <i>Cofactor binding</i>                                             | GO:0048037    | 37              |
| <i>Hydrogen ion transmembrane transporter activity</i>              | GO:0015078    | 17              |
| <i>Carboxylic acid catabolic process</i>                            | GO:0046395    | 16              |
| <i>Cellular respiration</i>                                         | GO:0045333    | 16              |
| <i>O-acyltransferase activity</i>                                   | GO:0003988    | 11              |
| <i>Proteasome complex</i>                                           | GO:0000502    | 14              |
| <i>Nucleotide binding</i>                                           | GO:0000166    | 112             |
| <i>Iron ion binding</i>                                             | GO:0005506    | 26              |
| <i>Ligase activity, forming carbon-sulfur bonds,</i>                | GO:0016877    | 9               |
| <i>Oxidoreductase activity, acting on NADH or NADPH</i>             | GO:0016651    | 9               |
| <i>Acyl-CoA metabolic process</i>                                   | GO:0006637    | 7               |
| <i>Oxidative phosphorylation</i>                                    | GO:0006119    | 11              |
| <i>Cellular nitrogen compound biosynthetic process</i>              | GO:0044271    | 27              |
| <i>Protein homodimerization activity</i>                            | GO:0042803    | 18              |
| <i>Vitamin metabolic process</i>                                    | GO:0006766    | 10              |
| <i>3-hydroxyacyl-CoA dehydrogenase activity</i>                     | GO:0003857    | 5               |
| <i>Carboxylic acid binding</i>                                      | GO:0031406    | 12              |
| <i>Mitochondrial outer membrane</i>                                 | GO:0005741    | 10              |
| <i>Magnesium ion binding</i>                                        | GO:0000287    | 29              |
| <i>Oxidoreductase activity, acting on the CH-NH group of donors</i> | GO:0016645    | 29              |
| <i>Mitochondrion organization</i>                                   | GO:0007005    | 13              |

A

| GeneName       | logFC fasted vs fed | adj.P.Val |
|----------------|---------------------|-----------|
| <i>Cyp4a14</i> | 8.90                | 4.43E-20  |
| <i>Cyp4a31</i> | 6.45                | 2.71E-20  |
| <i>Cyp4a10</i> | 6.43                | 7.32E-20  |
| <i>Igfbp1</i>  | 6.04                | 6.91E-11  |
| <i>Cyp4a31</i> | 5.56                | 5.01E-19  |
| <i>Cyp4a32</i> | 5.06                | 3.81E-14  |
| <i>Apoa4</i>   | 4.73                | 8.80E-17  |
| <i>Ppp1r3g</i> | 4.72                | 2.06E-08  |
| <i>Fsp27</i>   | 4.34                | 3.51E-14  |
| <i>Acot3</i>   | 3.87                | 3.72E-11  |
| <i>Fgf21</i>   | 3.86                | 1.14E-06  |

B

| GO_id      | Term                                              | Genes | p-value |
|------------|---------------------------------------------------|-------|---------|
| GO:0006629 | lipid metabolic process                           | 26    | 2.01E-9 |
| GO:0044281 | small molecule metabolic process                  | 31    | 2.14E-9 |
| GO:0044710 | single-organism metabolic process                 | 47    | 5.03E-8 |
| GO:0006082 | organic acid metabolic process                    | 22    | 2.14E-7 |
| GO:0044699 | single-organism process                           | 84    | 3.45E-7 |
| GO:0044763 | single-organism cellular process                  | 79    | 8.02E-7 |
| GO:0019752 | carboxylic acid metabolic process                 | 20    | 1.68E-6 |
| GO:0006790 | sulfur compound metabolic process                 | 13    | 2.27E-6 |
| GO:0032787 | monocarboxylic acid metabolic process             | 16    | 2.37E-6 |
| GO:0043436 | oxoacid metabolic process                         | 20    | 6.9E-6  |
| GO:0006637 | acyl-CoA metabolic process                        | 8     | 7.61E-6 |
| GO:0035383 | thioester metabolic process                       | 8     | 7.61E-6 |
| GO:0044255 | cellular lipid metabolic process                  | 19    | 8.09E-6 |
| GO:0006732 | coenzyme metabolic process                        | 12    | 9.41E-6 |
| GO:0001676 | long-chain fatty acid metabolic process           | 8     | 2.29E-5 |
| GO:0051186 | cofactor metabolic process                        | 12    | 1.09E-4 |
| GO:0006631 | fatty acid metabolic process                      | 11    | 1.29E-3 |
| GO:0032789 | unsaturated monocarboxylic acid metabolic process | 3     | 1.97E-3 |
| GO:0032788 | saturated monocarboxylic acid metabolic process   | 3     | 1.97E-3 |
| GO:0032869 | cellular response to insulin stimulus             | 8     | 3.62E-3 |
| GO:0006641 | triglyceride metabolic process                    | 6     | 4.41E-3 |
| GO:0008202 | steroid metabolic process                         | 9     | 8.25E-3 |
| GO:0019217 | regulation of fatty acid metabolic process        | 6     | 8.54E-3 |
| GO:0006639 | acylglycerol metabolic process                    | 6     | 1.16E-2 |
| GO:0006638 | neutral lipid metabolic process                   | 6     | 1.27E-2 |
| GO:0009987 | cellular process                                  | 79    | 2.97E-2 |
| GO:0071375 | cellular response to peptide hormone stimulus     | 8     | 4.35E-2 |
| GO:0032868 | response to insulin                               | 8     | 4.75E-2 |
| GO:0010565 | regulation of cellular ketone metabolic process   | 7     | 6.67E-2 |
| GO:1901653 | cellular response to peptide                      | 8     | 6.96E-2 |
| GO:0008152 | metabolic process                                 | 63    | 9.02E-2 |

C

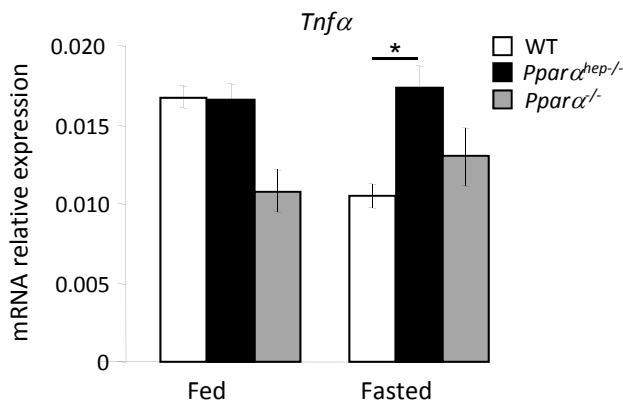

D

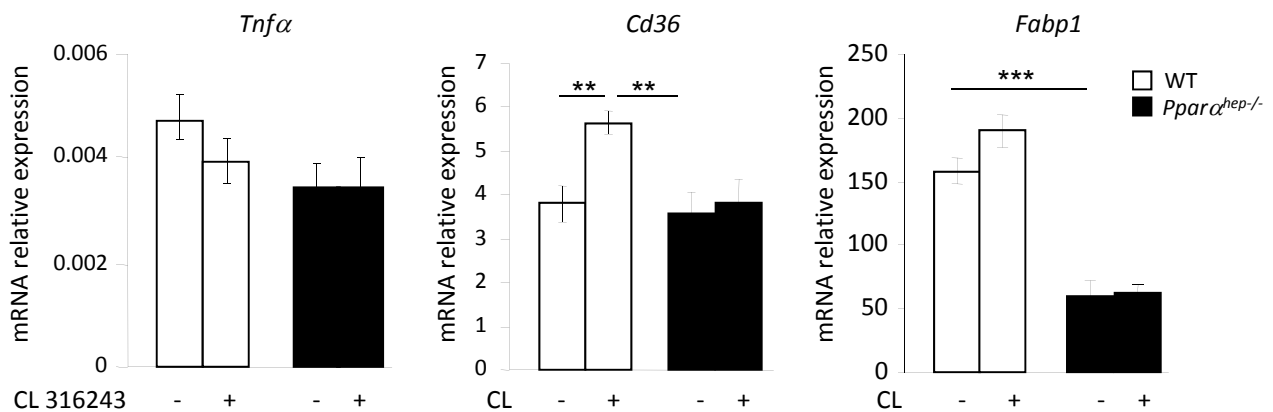

**A.** Top 11 genes induced by fasting in WT mice. In red genes regulated by fenofibrate and by fasting and dependent on hepatocyte PPAR $\alpha$  activity. **B** Top GO biological process sensitive to fasting in WT mice (130 genes regulated with log FC>1.5). **C** Hepatic mRNA expression levels of *Tnfa* measured by qRT-PCR in liver samples of WT, *Ppara $\alpha$ <sup>-/-</sup>*, *Ppara $\alpha$ <sup>hep-/-</sup>* 8 week-old male fed or fasted for 24 hours. **D.** Hepatic mRNA expression levels of *Tnfa*, *Cd36* and *Fabp1* measured by qRT-PCR in 4 month-old male WT and *Ppara $\alpha$ <sup>hep-/-</sup>* mice treated with the  $\beta$ 3-adrenergic receptor agonist CL316243 or vehicle at ZT6 and then killed at ZT14. Data are shown as mean  $\pm$  SEM. \* $p \leq 0.05$ , \*\* $p \leq 0.01$ , \*\*\* $p \leq 0.005$ .

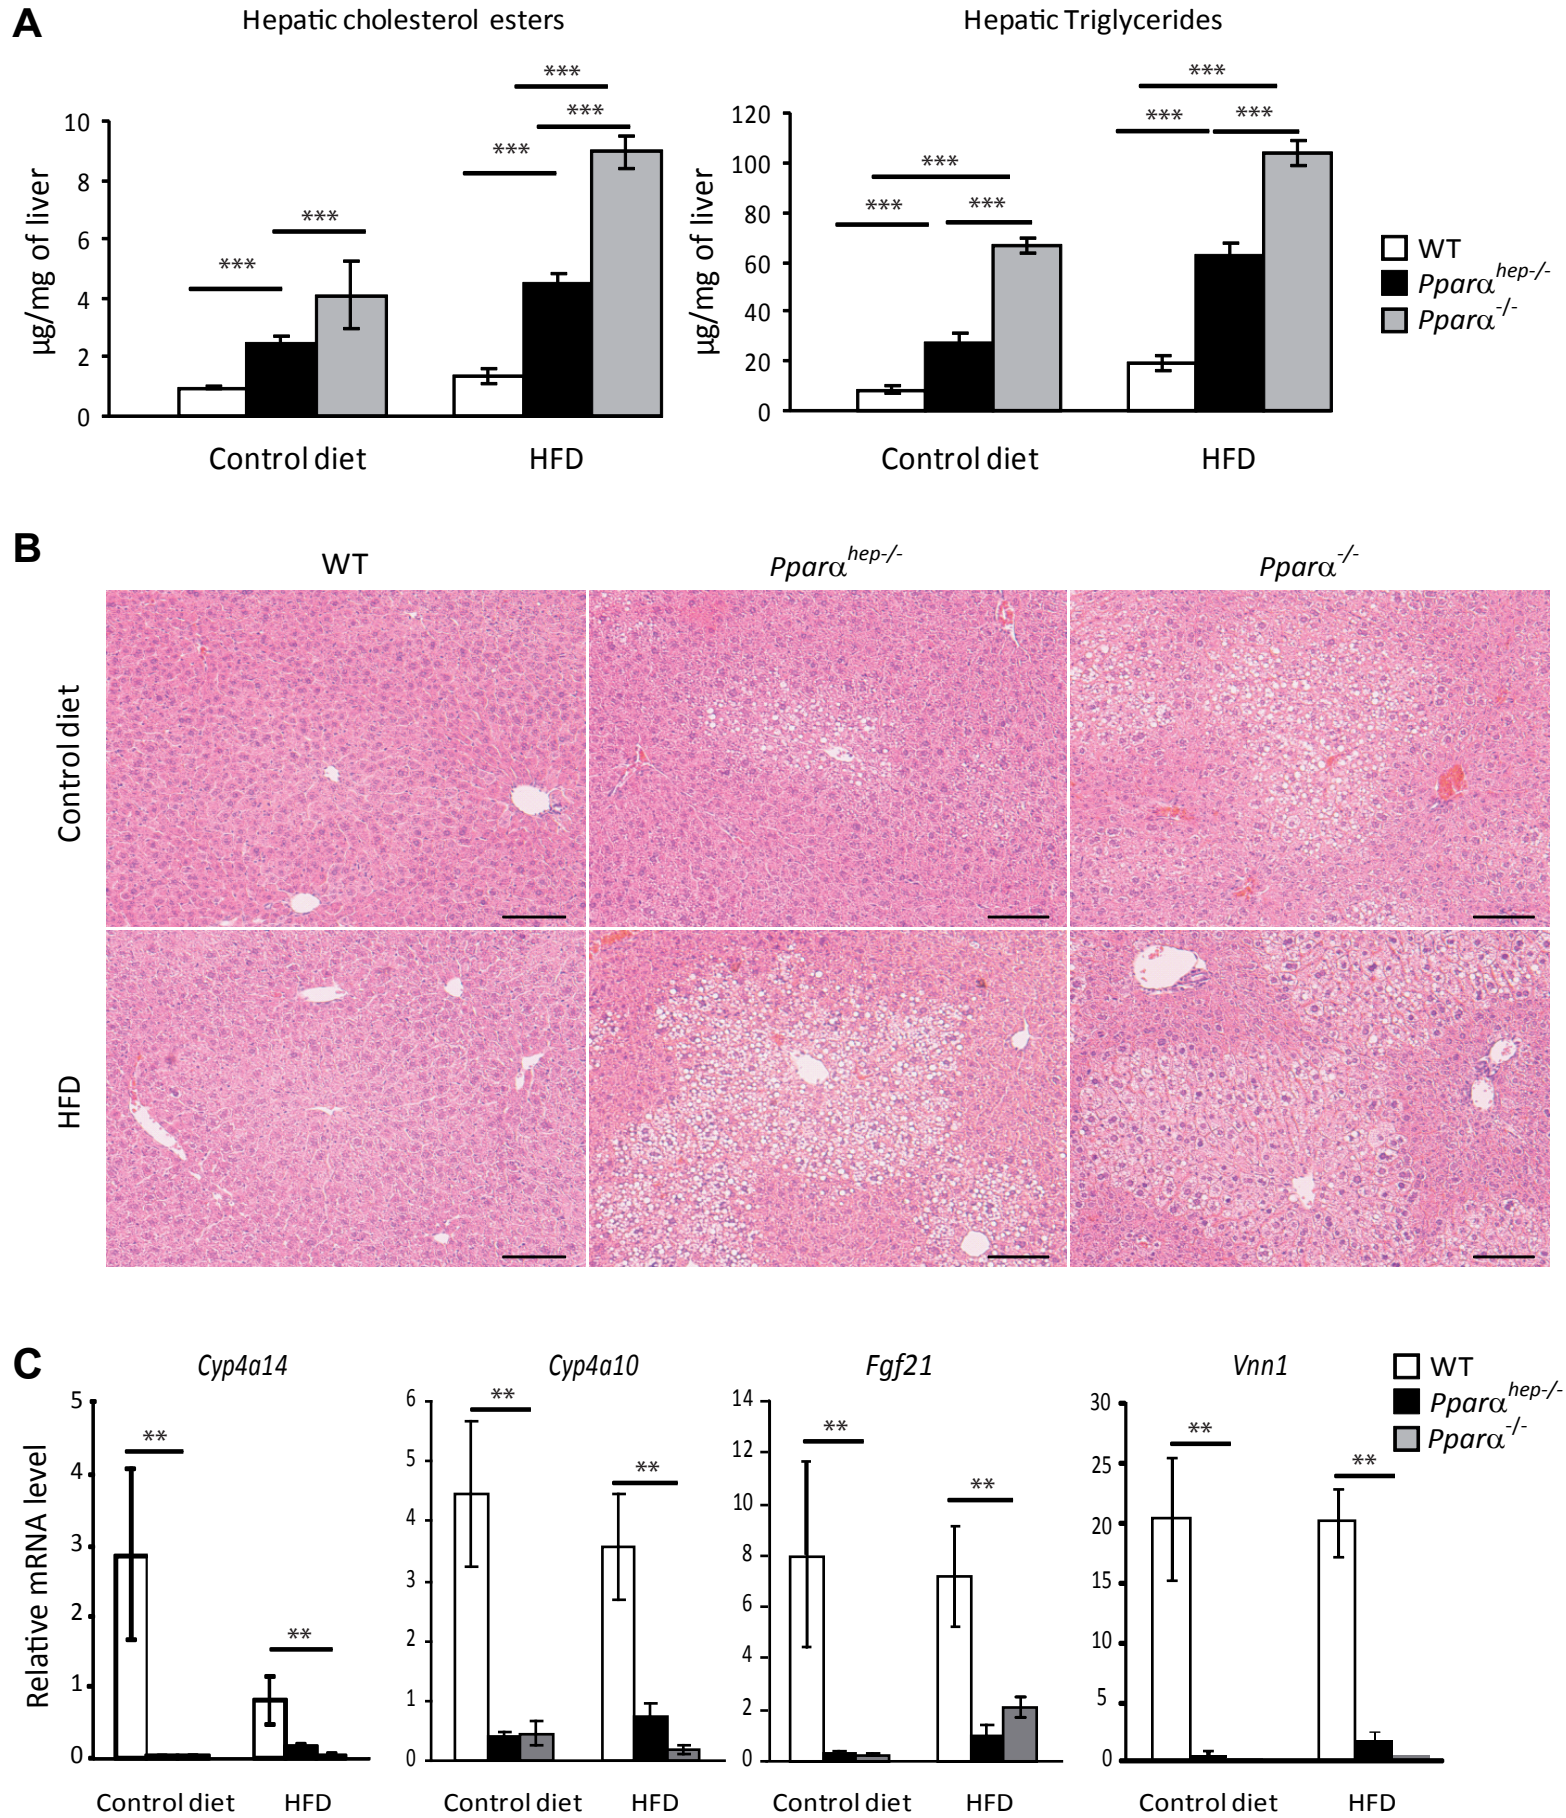

Liver PPAR $\alpha$  deficiency aggravates steatosis in response to a High Fat Diet (HFD). Wild-type (WT), PPAR $\alpha$  hepatocyte knockout (*Ppara*<sup>hep-/-</sup>) and PPAR $\alpha$  knockout (*Ppara*<sup>-/-</sup>) mice were fed a HFD or a control diet for 2 weeks and were killed at ZT8. (A) Quantification of hepatic triglycerides and cholesterol esters. (B) Representative pictures of hematoxylin/eosin staining on liver sections. Scale bar, 100  $\mu$ m. (C) Hepatic mRNA expression levels of *Cyp4a14*, *Cyp4a10*, *Fgf21* and *Vnn1*. Data are shown as mean  $\pm$  SEM. \*  $p < 0.05$ , \*\*  $p < 0.01$ , \*\*\*  $p < 0.005$ .



A

| Gene name      | Ref Seq   | Description                                                    | LogFC<br><i>Pparα</i> <sup>hep-/-</sup><br>vs WT | Adj.P.Val |
|----------------|-----------|----------------------------------------------------------------|--------------------------------------------------|-----------|
| <i>ApoN</i>    | NM_133996 | Apolipoprotein N (ApoN)                                        | 0.79                                             | 9.85E-05  |
| <i>ApoF</i>    | NM_133997 | apolipoprotein F (ApoF)                                        | 0.37                                             | 0.016     |
| <i>ApoL10a</i> | NM_177744 | Apolipoprotein L 10a                                           | 0.39                                             | 0.031     |
| <i>ApoA4</i>   | NM_007468 | Apolipoprotein A-IV                                            | 1.97                                             | 6.03E-05  |
|                |           |                                                                |                                                  |           |
| <i>Abcg5</i>   | NM_031884 | ATP-binding cassette, sub-family G (WHITE), member 5 (Abcg5)   | -0.93                                            | 0.001     |
| <i>Abcg8</i>   | NM_026180 | ATP-binding cassette, sub-family G (WHITE), member 8 (Abcg8)   | -0.81                                            | 0.002     |
| <i>Abcb4</i>   | NM_008830 | ATP-binding cassette, sub-family B (MDR/TAP), member 4 (Abcb4) | -0.53                                            | 0.009     |

B

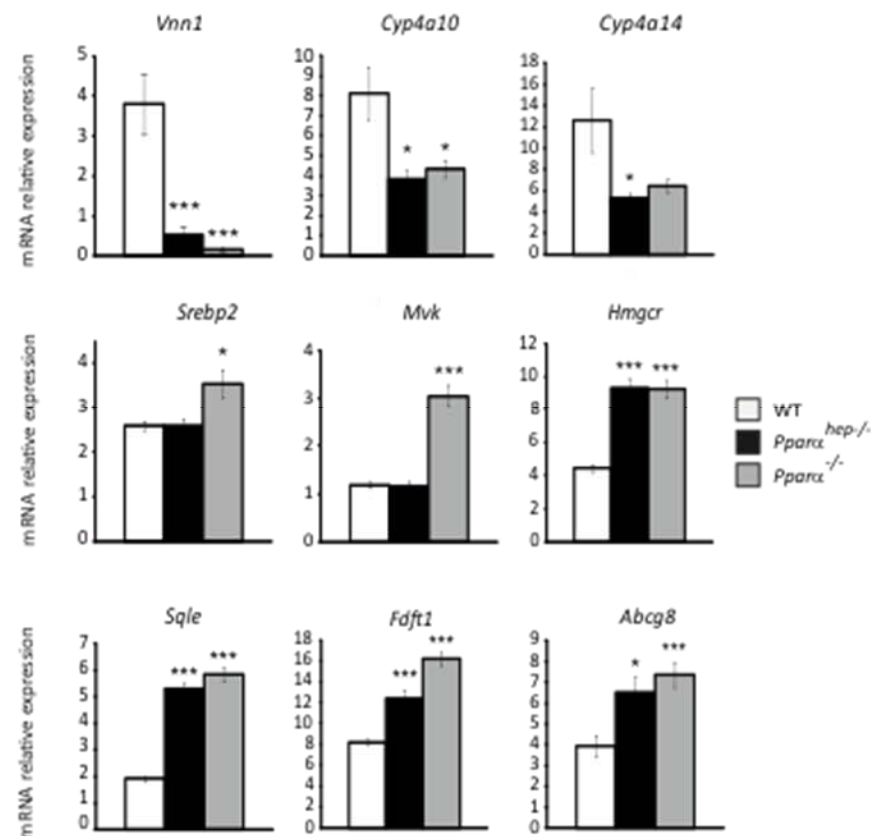

***Pparα* deficiency impact hepatic cholesterol metabolism.** A. Table listing significant differentially expressed genes related to cholesterol metabolism in liver samples from *Pparα*<sup>hep-/-</sup> vs WT mice. Data are extracted from microarrays analysis performed on samples from 8 week-old male mice in the fed state. B. Hepatic mRNA expression levels of PPARα target genes (*Vnn1*, *Cyp4a10* and *Cyp4a14*) and cholesterol metabolism related genes (*Srebp2*, *Mvk*, *Hmgcr*, *Sqle*, *Fdft1* and *Abcg8*) measured by qRT-PCR in fed 52 week-old male mice from WT, *Pparα*<sup>hep-/-</sup> and *Pparα*<sup>-/-</sup> genotypes. Data are shown as mean ± SEM. \*p ≤ 0.05, \*\*\*p ≤ 0.005.
